# Supplementary material for: Alleviation of Gut Inflammation by Cdx2/Pxr Pathway in a Mouse Model of Chemical Colitis
Source: PubMed Central journal article supplement (PMC3398007; doi:10.1371/journal.pone.0036075), 2012-07-16
Supplement: pone.0036075.s004.pdf [file pone.0036075.s004.pdf]

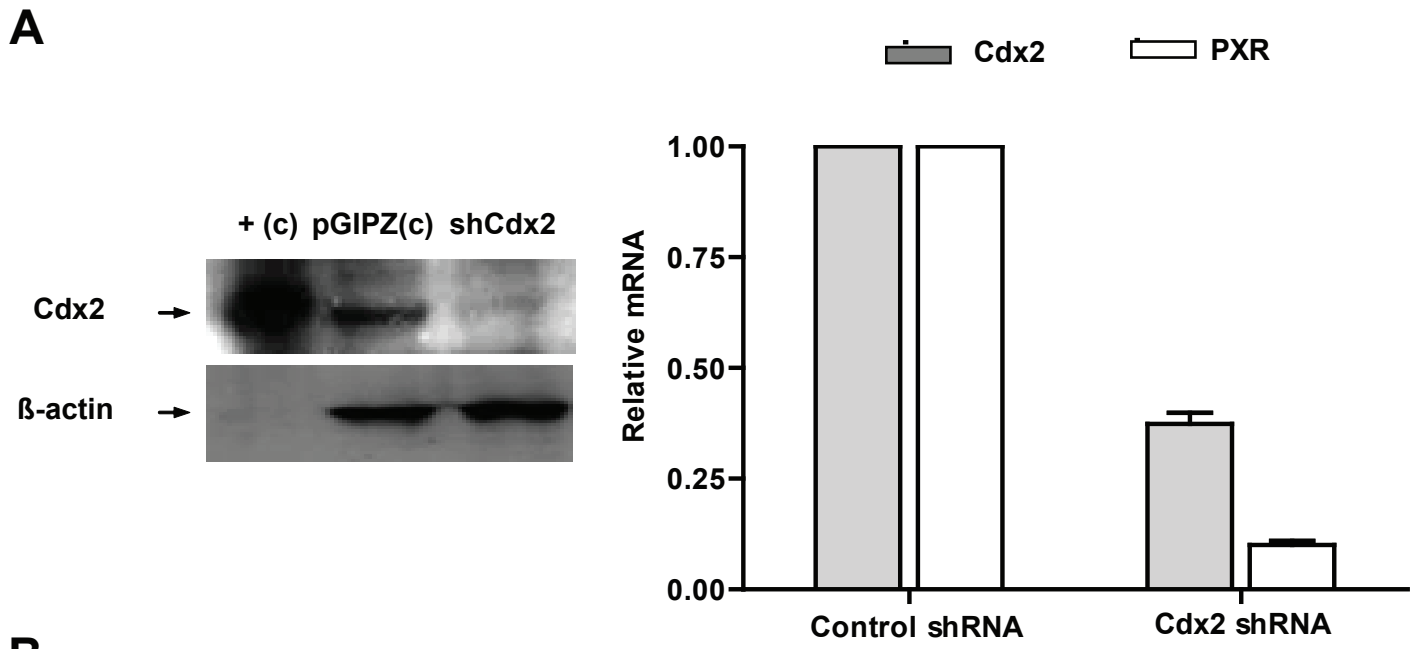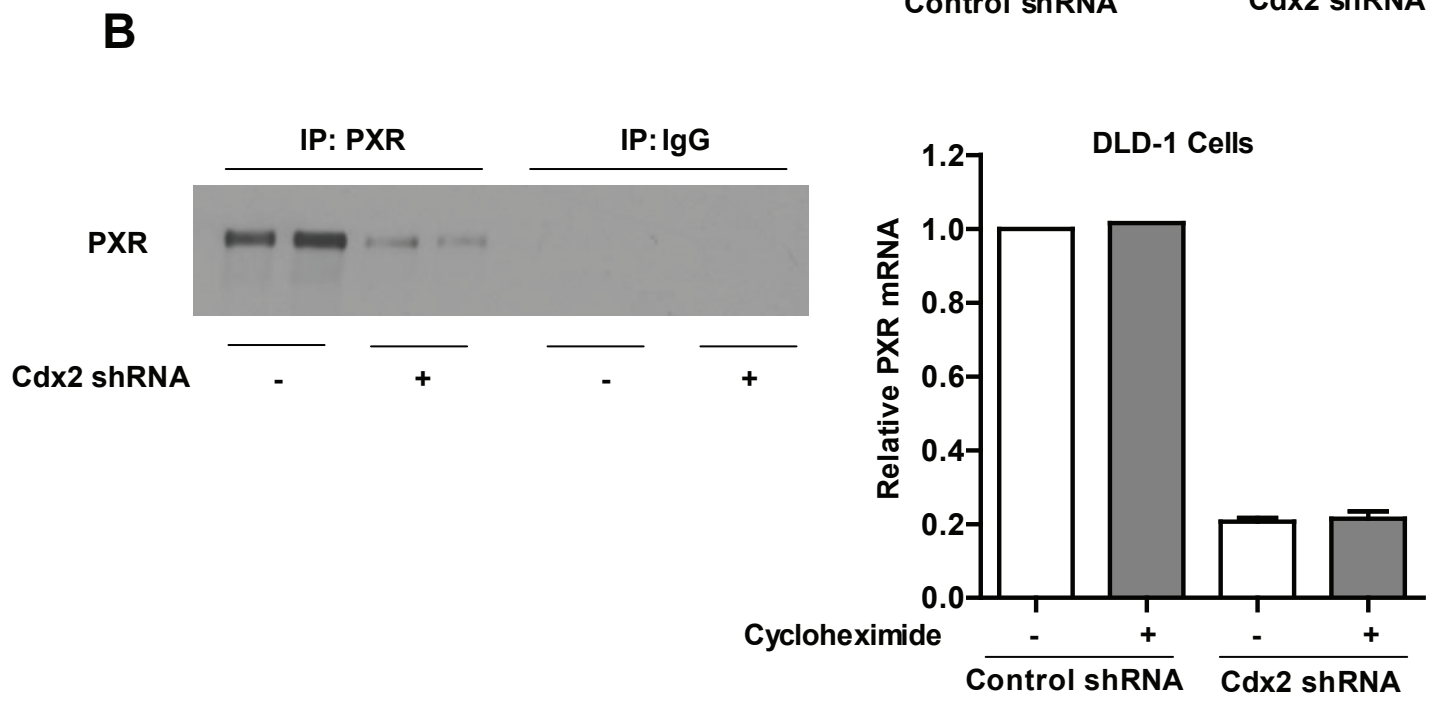

Figure S4
